# Supplementary material for: Multifunctional electrospun pcl mats with activated carbon and silver ions for wound care applications
Source: Research Square preprint supplement (doi:10.21203/rs.3.rs-7951668/v1), 2025-11-05

Graphical Abstract Image: Schematic illustration of the fabrication process and multifunctional properties of electrospun poly(ε-caprolactone) (PCL) mats containing activated carbon (AC) functionalized with silver ions (Ag⁺). The figure highlights the sequential steps of AC impregnation with silver, incorporation into the PCL polymer solution, electrospinning to form nanofibrous membranes, and the resulting application as bioactive wound dressings with antimicrobial and exudate-absorbing capabilities.


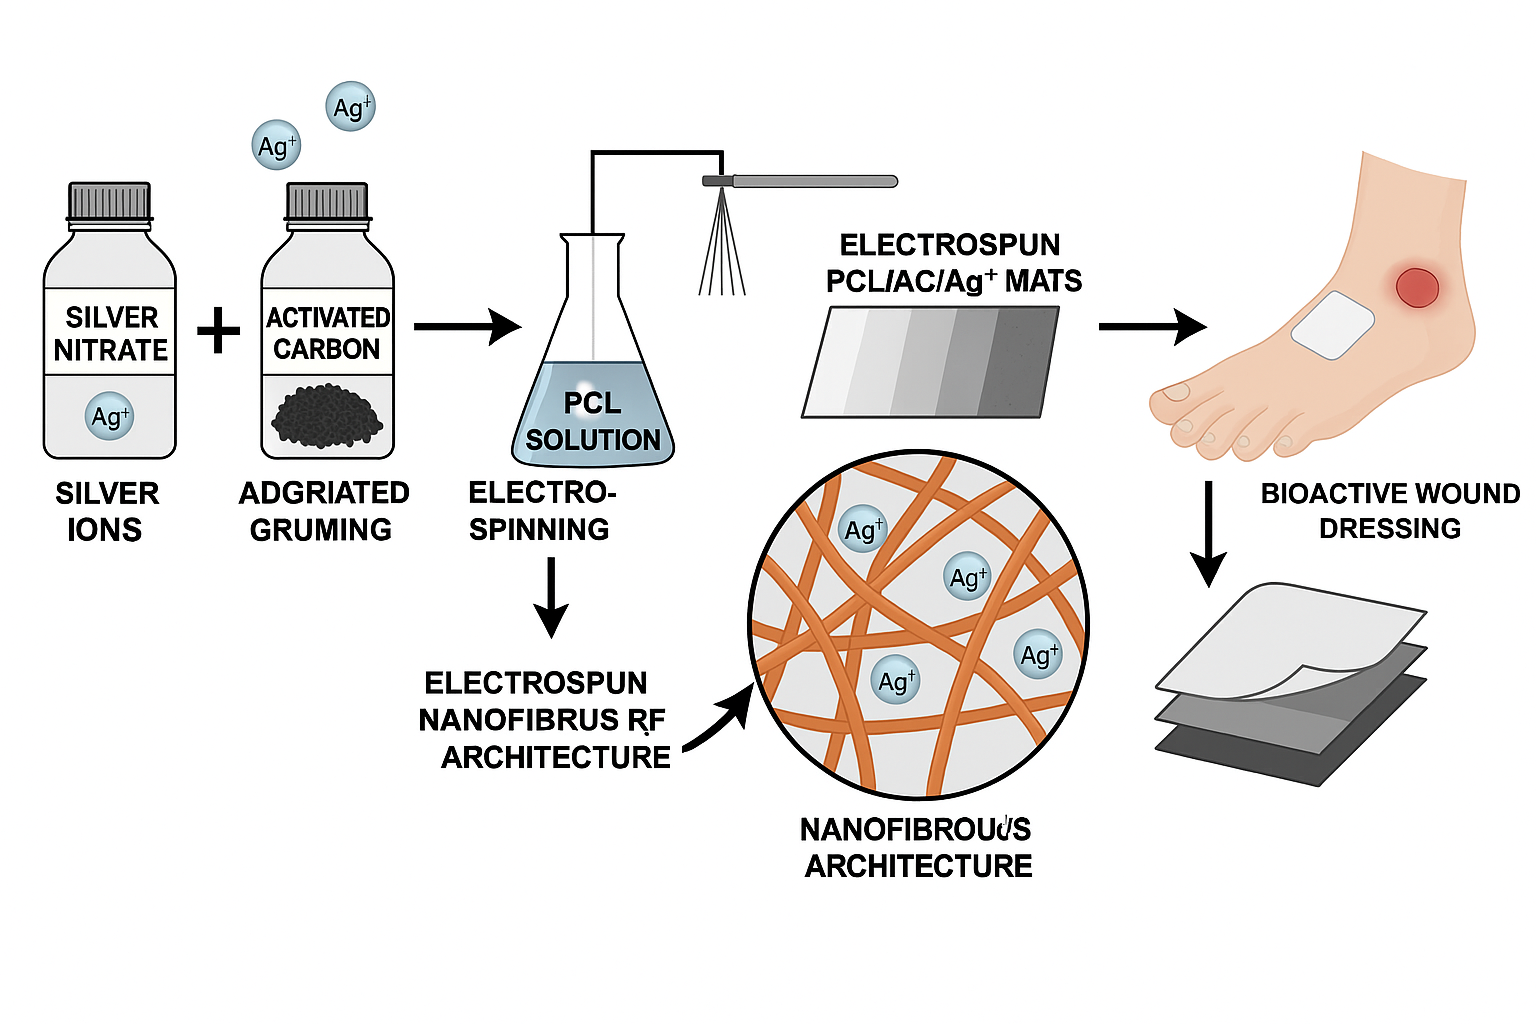

Supplement: Supplementary file 1 [file d524ef58508e3e758219d0d1.docx]
